# Supplementary material
Source: publisher figshare collection journal article supplement (https://sage.figshare.com/ndownloader/files/20135945)
Supplement: Supplementary file 1 [file 20135945]

**SUPPLEMENTARY MATERIAL**

**Two New Compounds from Rhizomes of *Musa basjoo***

**Li Jiang1,3, Yang Wang1,3, Min Hui Zhu1,3, Lin Zheng2, Lin Zhen Li3, Ai Min Wang2, Chang Hu Lin1,**

**Ting Liu2 and Yong Jun Li1**

1*State Key Laboratory of Functions and Applications of Medicinal Plants & Engineering Research Center for the Development and Application of Ethnic Medicine and TCM (Ministry of Education), Guizhou Medical University, Guiyang 550004, Guizhou, P. R. China*

2*Guizhou Provincial Key Laboratory of Pharmaceutics, Guizhou Medical University, Guiyang 550004, Guizhou, P. R. China*

3*School of Pharmacy, Guizhou Medical University, University Town, Guian New District 550025, Guizhou, P. R. China*

[*1586740@qq.com*](mailto:1586740@qq.com) *for T. Liu,* [*liyongjun026@126.com*](mailto:liyongjun026@126.com) *for Y.-J. Li*

**Contents Page**

**Table S1**. HMBC correlations of compounds **1**- **2**

**Figure S1**: HR-ESI-MS spectrum of Compound **1**

**Figure S2**: 1H-NMR (400 MHz, CDCl3) Spectrum of Compound **1**

**Figure S3**: 13C-NMR (100 MHz, CDCl3) Spectrum of Compound **1**

**Figure S4**: HMQC (400 MHz, CDCl3) Spectrum of Compound **1**

**Figure S5**: HMBC (400 MHz, CDCl3) Spectrum of Compound **1**

**Figure S6**: HR-ESI-MS spectrum of Compound **2**

**Figure S7**: 1H-NMR (400 MHz, CDCl3) Spectrum of Compound **2**

**Figure S8**: 13C-NMR (100 MHz, CDCl3) Spectrum of Compound **2**

**Figure S9**: HMQC (400 MHz, CDCl3) Spectrum of Compound **2**

**Figure S10**: HMBC (400 MHz, CDCl3) Spectrum of Compound **2**

| Position | | **1** | **2** | |
| --- | --- | --- | --- | --- |
| HMBC(H→C) | HMBC(H→C) | |
| 1 |  | | |  | |
| 2 |  | | |  | |
| 3 | C-2′, 6′ | | | C-1′, 1 | |
| 4 |  | | | C-2, 5, 8a | |
| 4a |  | | |  | |
| 5 |  | | | C-7, 8a | |
| 6 | C-7 | | | C-7, 8, 4a | |
| 6a |  | | |  | |
| 7 | C-6, 6a, 9 | | |  | |
| 8 |  | | | C-6, 7, 4a | |
| 8a |  | | |  | |
| 9 |  | | |  | |
| 10 | C-6a, 8, 10b | | | C-9, 11 | |
| 10a |  | | |  | |
| 10b |  | | |  | |
| 11 |  | | | C-10 | |
| 1′ |  | | |  | |
| 2′, 6′ | C-4′,3′, 5′, 3 | | | C-3′, 5′,1′, 2 | |
| 3′,5′ | C-1′,4′ | | | C-2′, 6′,1′ | |
| 4′ |  | | |  | |
| 9-OCH3 | C-9 | | |  | |
| 4′-OCH3 | C- 4′ | | |  | |
| 8--OH |  | | |  | |

**Table S1**. HMBC correlations of compounds **1**- **3**

**
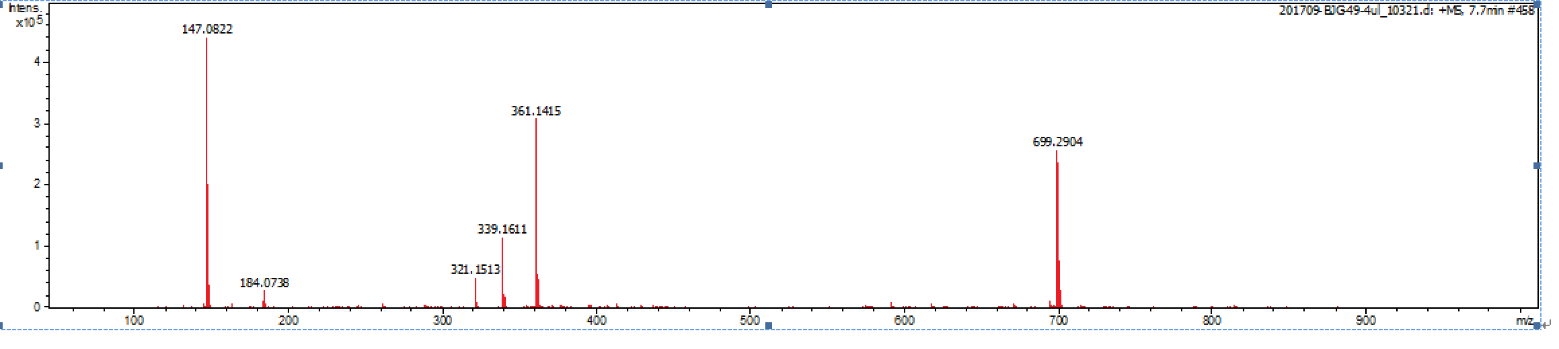
**

**Figure S1**: HR-ESI-MS spectrum of Compound **1**

**
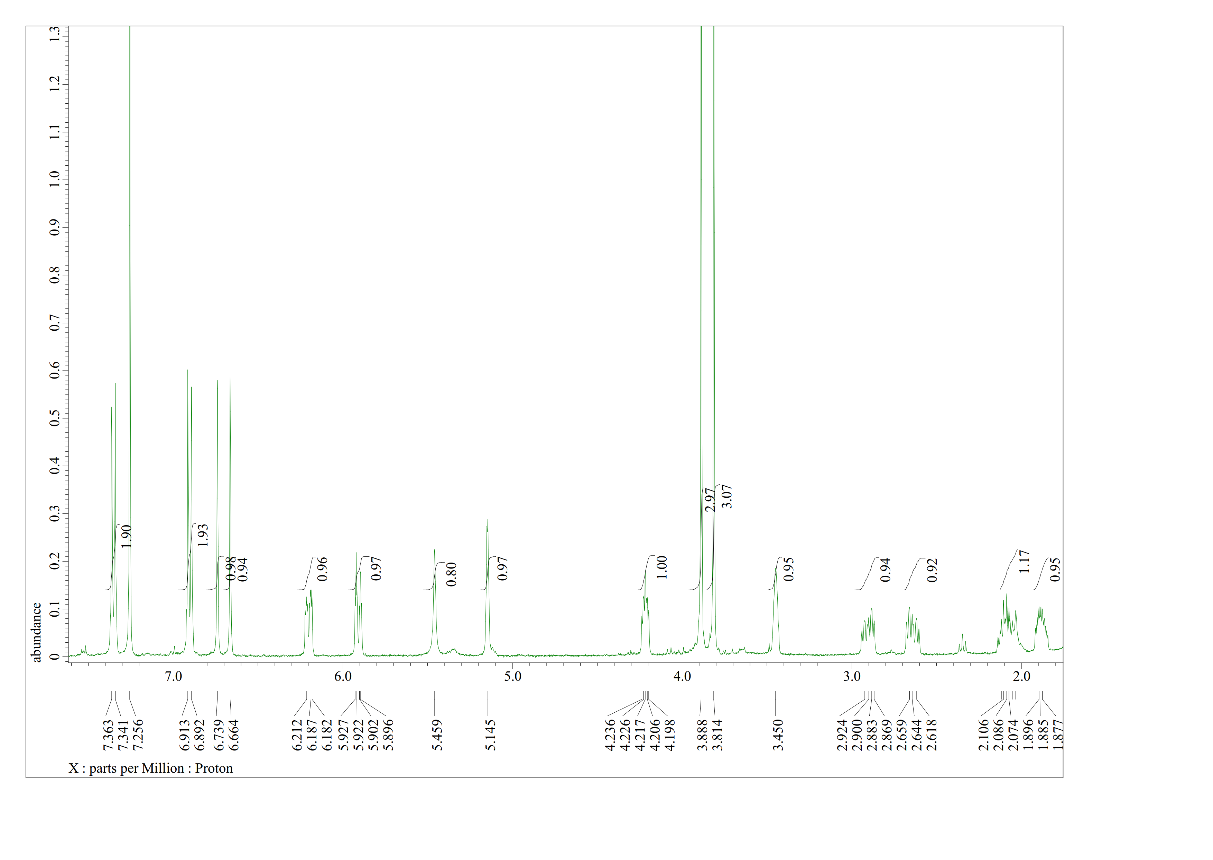
**

**Figure S2**: 1H-NMR (400 MHz, CDCl3) Spectrum of Compound **1**

**
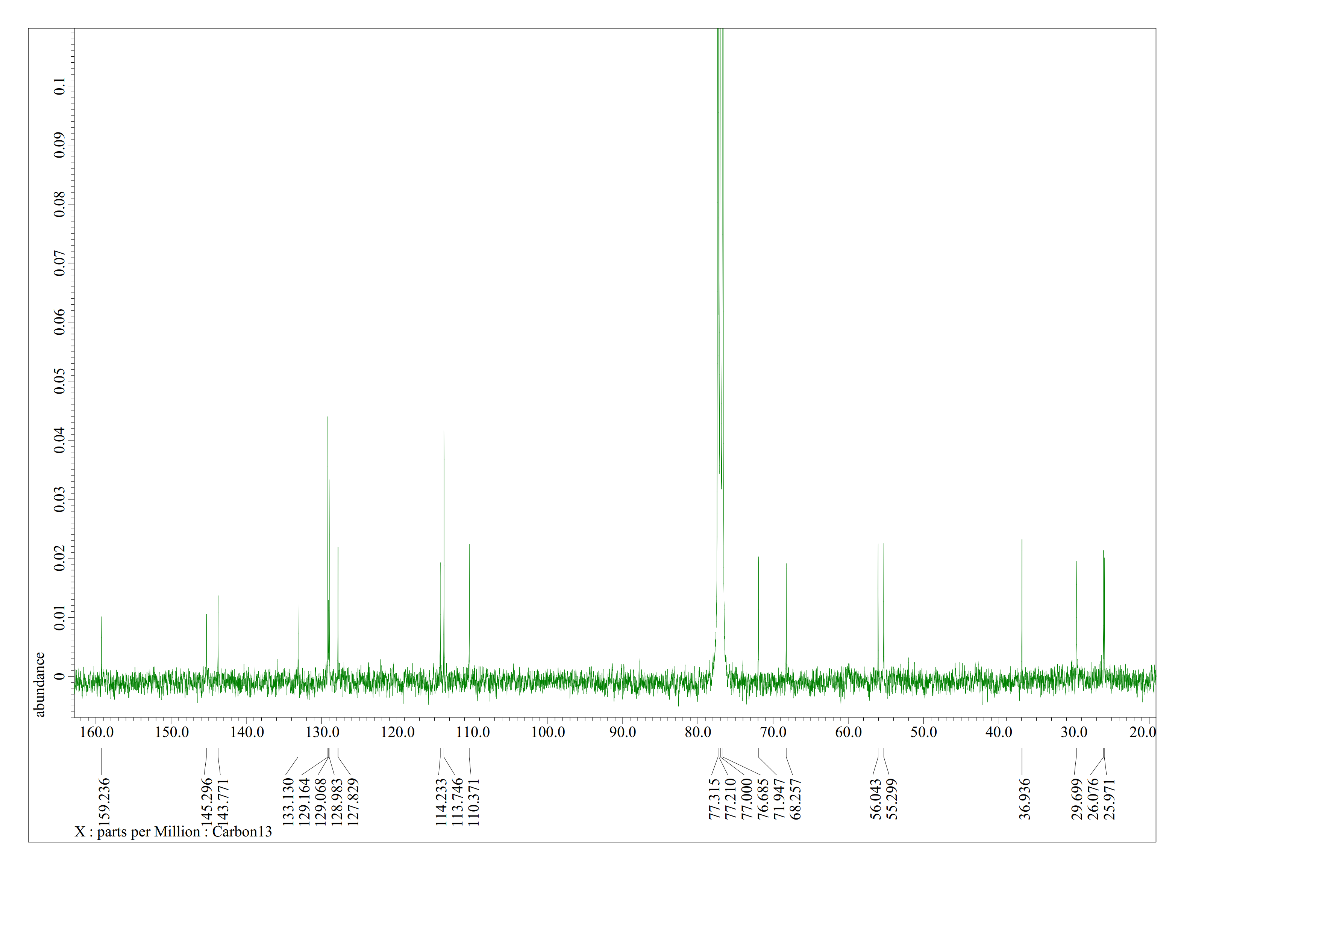
**

**Figure S3**: 13C-NMR (100 MHz, CDCl3) Spectrum of Compound **1**

**
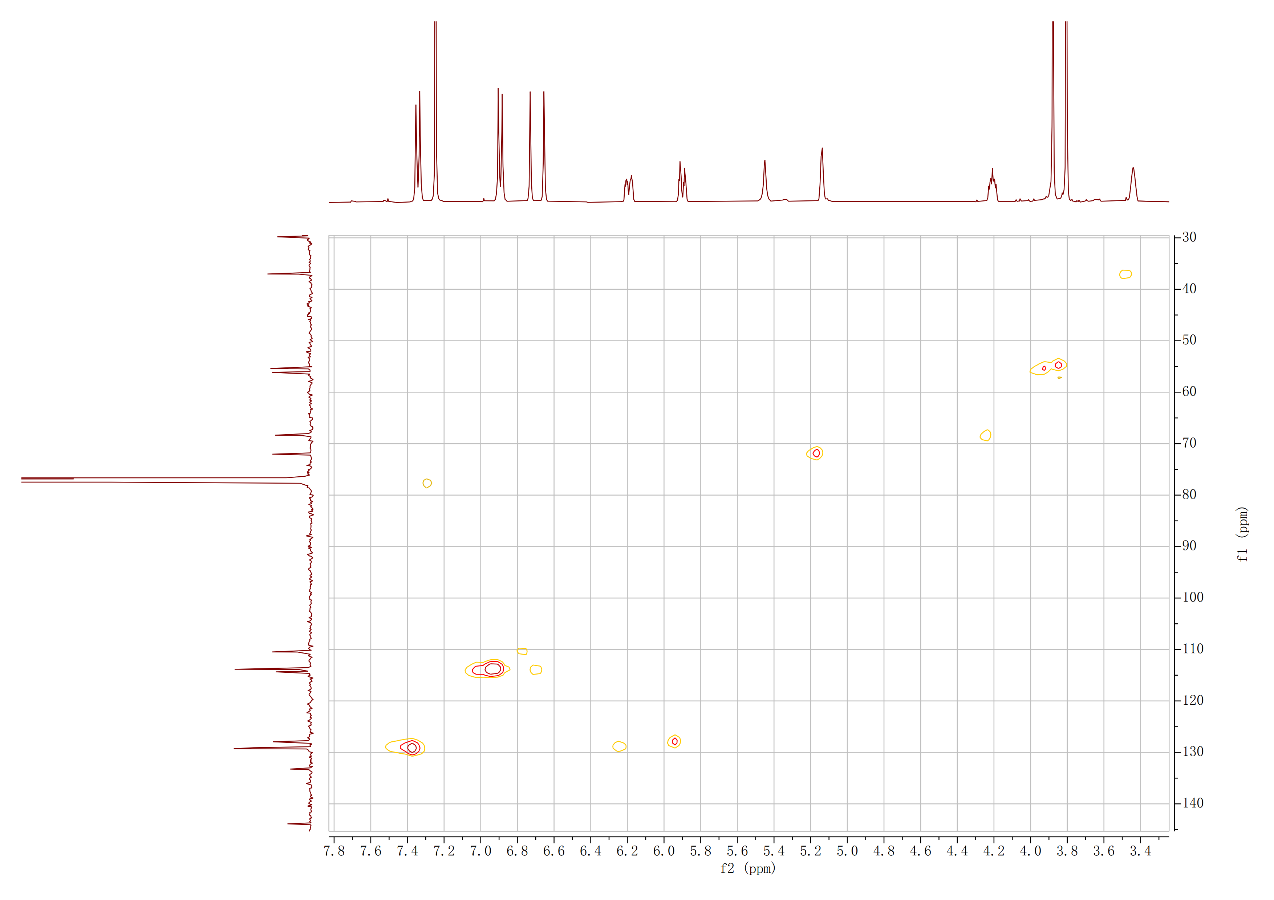
**

**Figure S4**: HMQC (400 MHz, CDCl3) Spectrum of Compound **1**

**
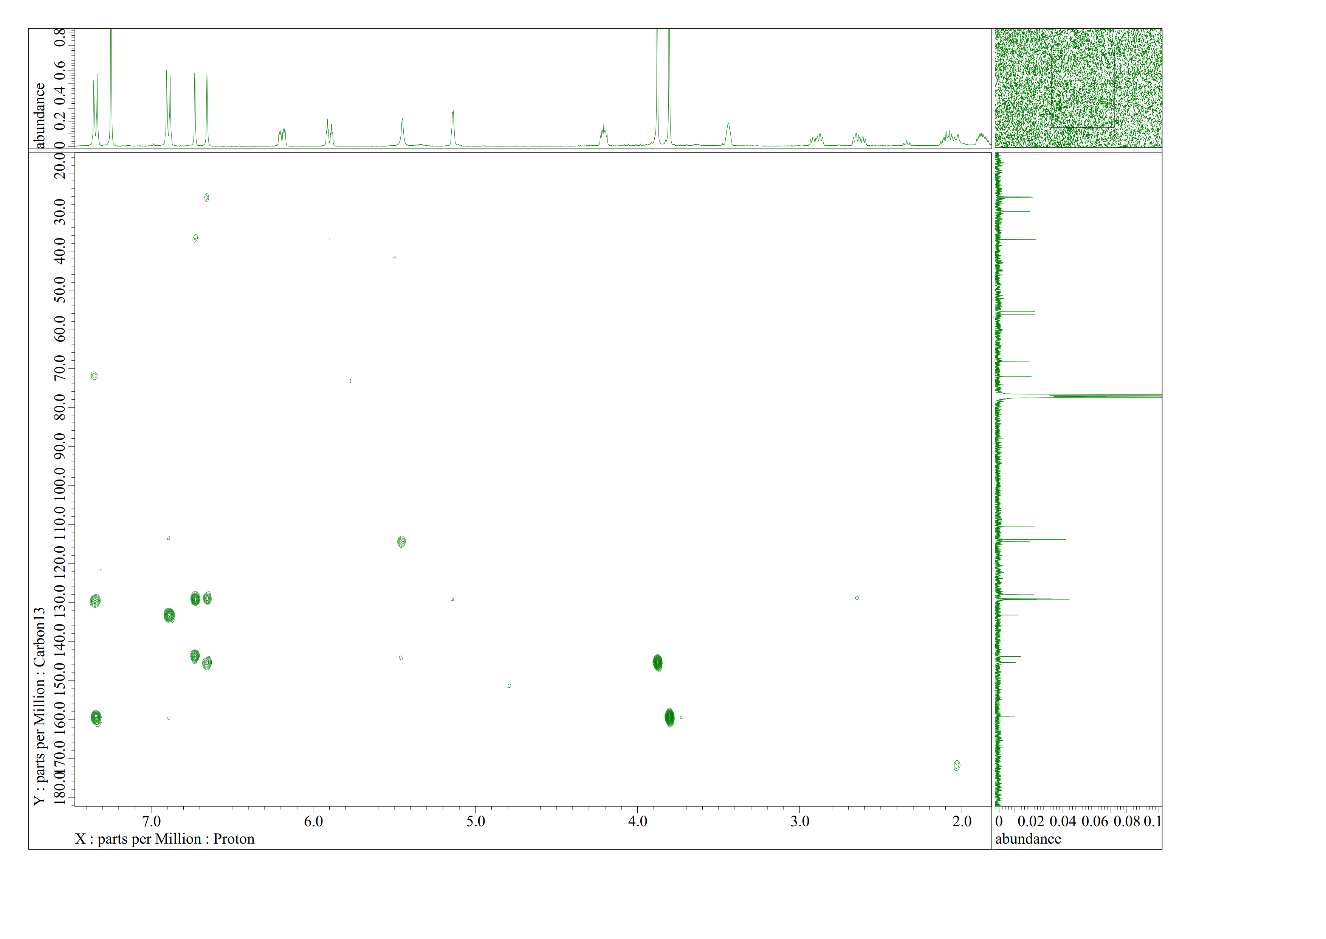
**

**Figure S5**: HMBC (400 MHz, CDCl3) Spectrum of Compound **1**

**
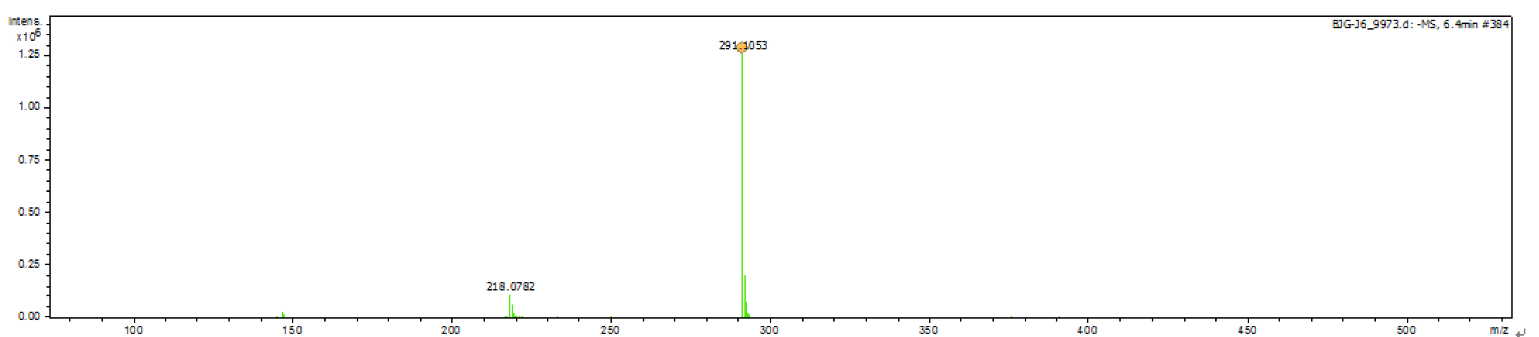
**

**Figure S6**: HR-ESI-MS spectrum of Compound **2**

**
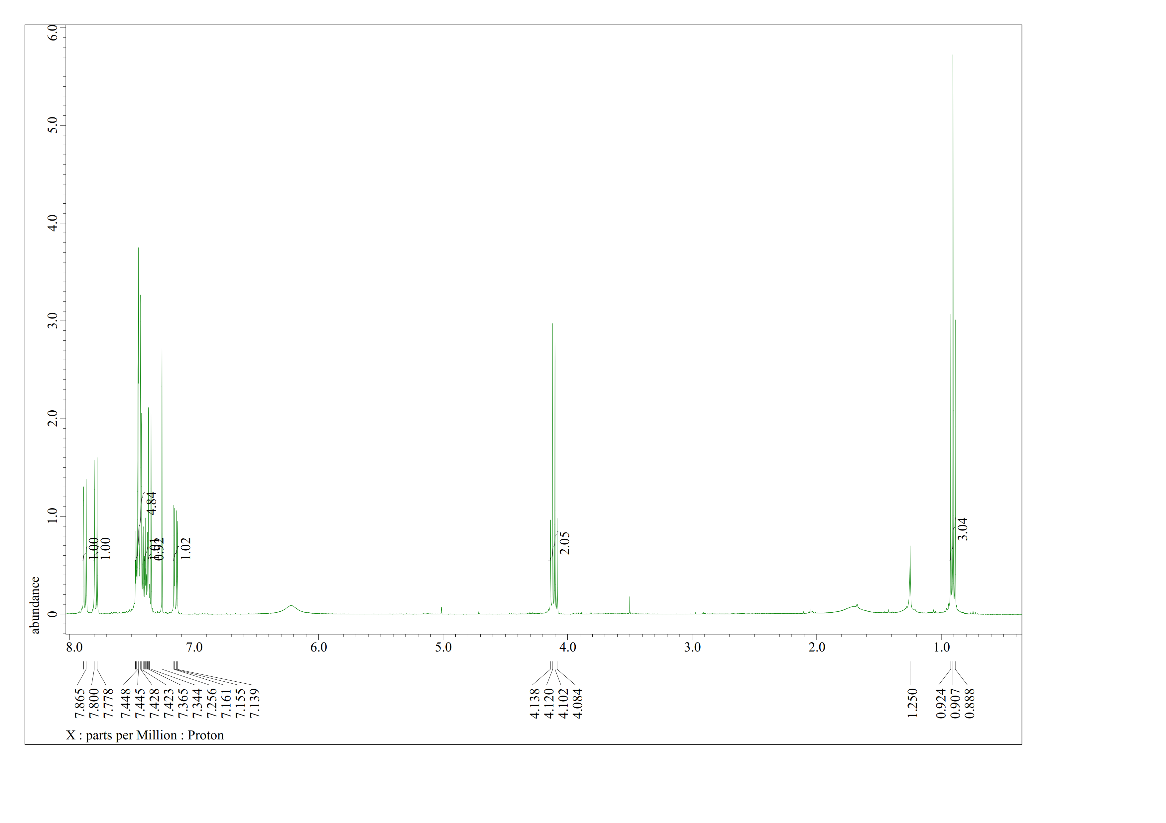
**

**Figure S7**: 1H-NMR (400 MHz, CDCl3) Spectrum of Compound **2**

**
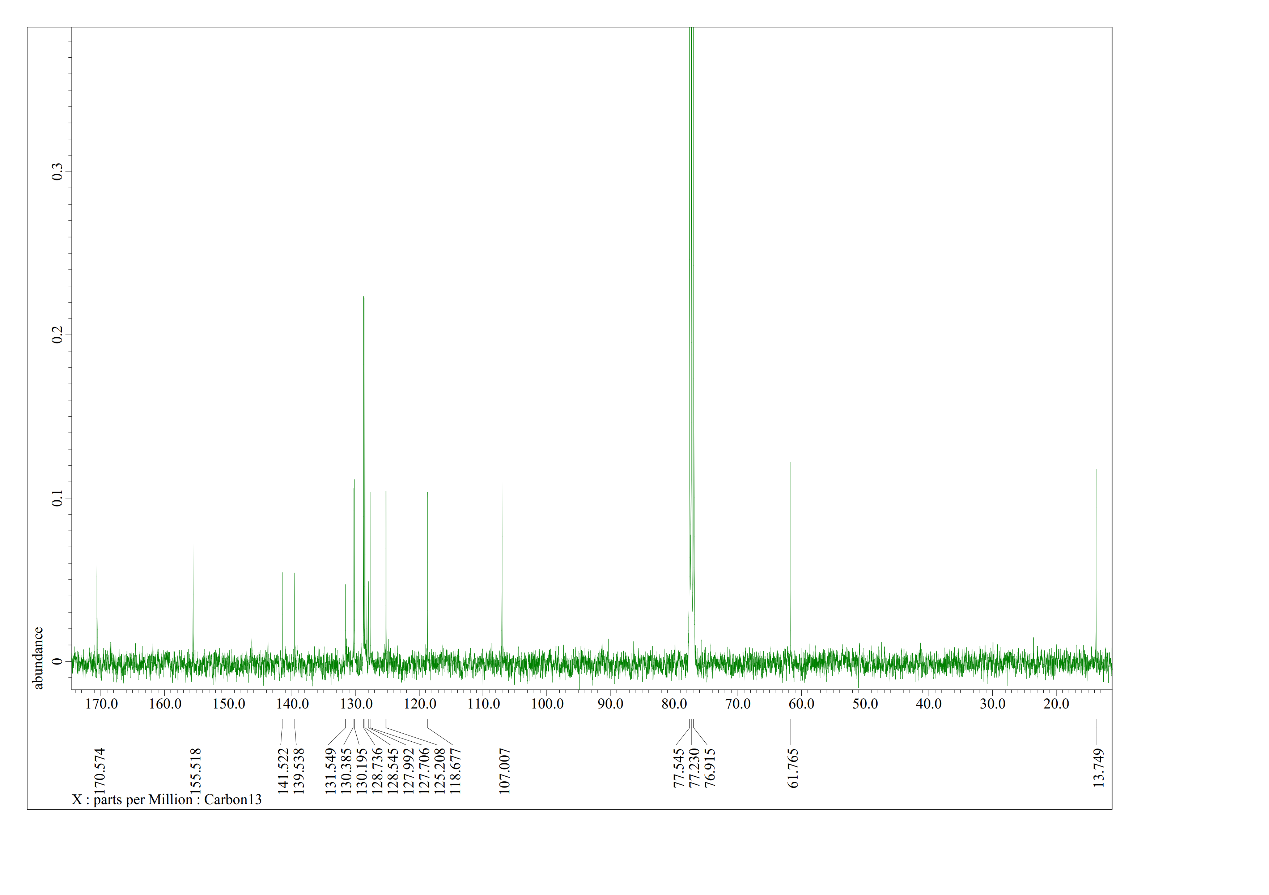
**

**Figure S8**: 13C-NMR (100 MHz, CDCl3) Spectrum of Compound **2**

**
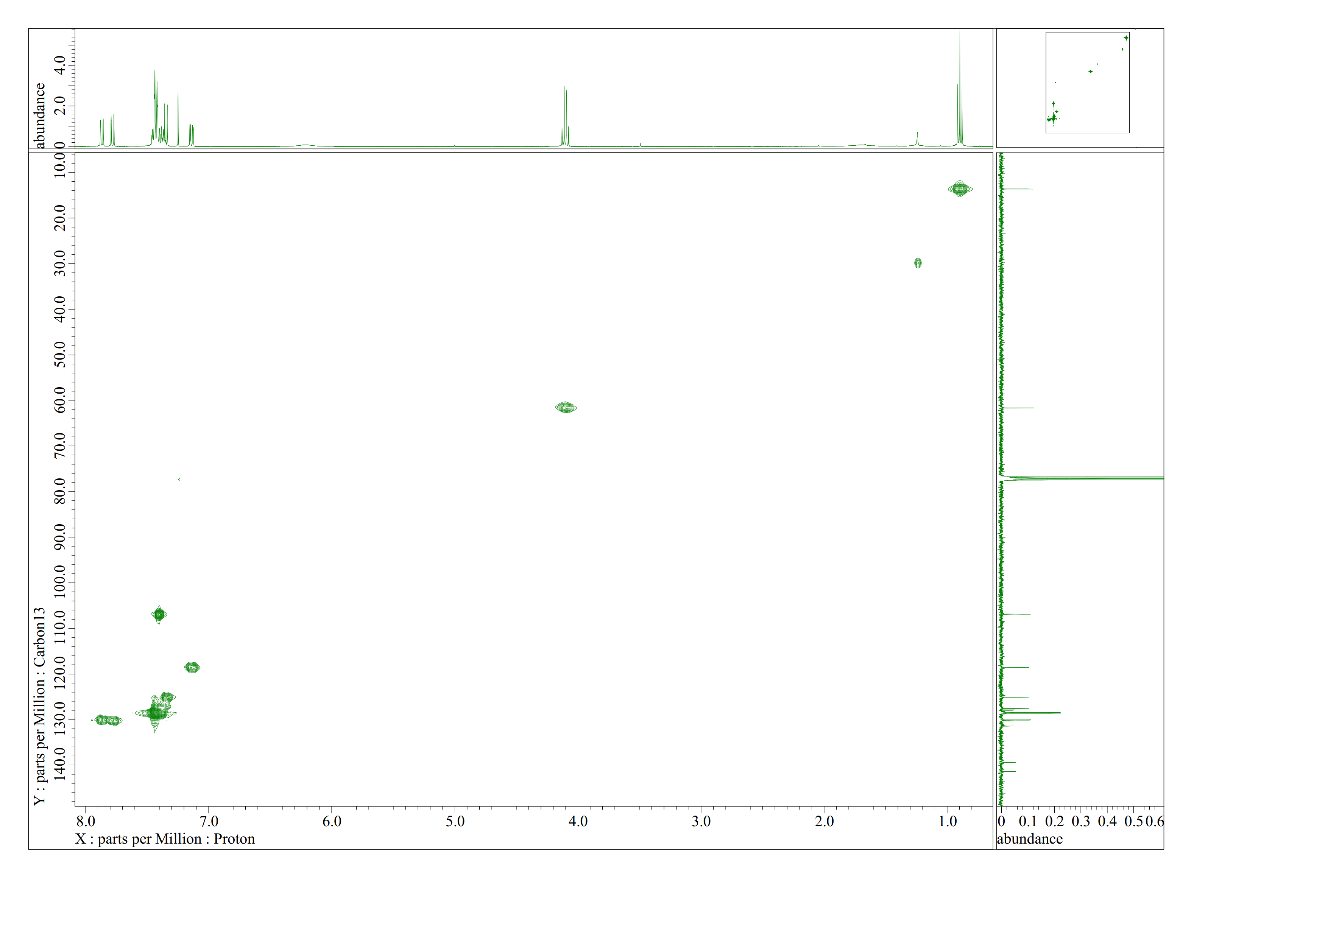
**

**Figure S9**: HMQC (400 MHz, CDCl3) Spectrum of Compound **2**

**
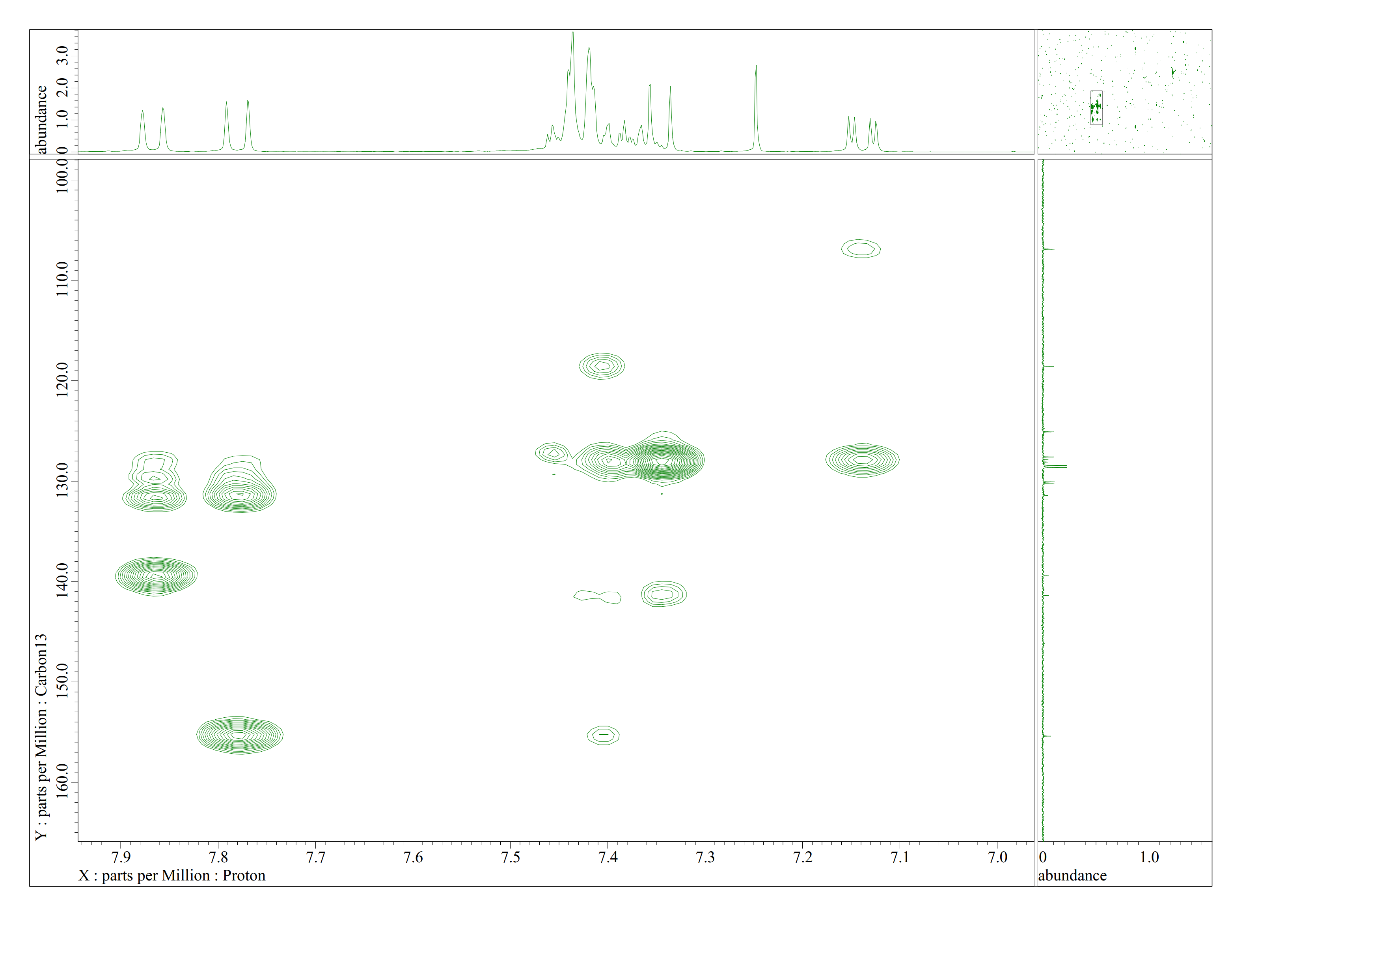
**

**Figure S10**: HMBC (400 MHz, CDCl3) Spectrum of Compound **2**
